# Supplementary material
Source: PubMed Central journal article supplement (PMC2754402)
Supplement: NIHMS115014-supplement-01.pdf [file NIHMS115014-supplement-01.pdf]

**Supplementary Table 1. Structurally similar proteins to p115 from Dali server**

| PDB ID(-chain) | Z score for single chain of p115 dimer | Function/Protein                                                         |
|----------------|----------------------------------------|--------------------------------------------------------------------------|
| 1ee4-A         | 23.0                                   | TRANSPORT PROTEIN, karyopherin (importin) alpha fragment                 |
| 1bk5-A         | 21.6                                   | PROTEIN TRANSPORT, karyopherin (importin) alpha fragment                 |
| 3bct           | 20.7                                   | ARMADILLO REPEAT, beta-catenin fragment                                  |
| 1xqr-A         | 19.2                                   | CHAPERONE, hspbp1 protein fragment Mutant                                |
| 1z2c-B         | 15.0                                   | SIGNALING PROTEIN, rho-related gtp-binding protein rhoc                  |
| 1ho8-A         | 14.6                                   | HYDROLASE, vacuolar atp synthase subunit h                               |
| 1wa5-C         | 13.3                                   | NUCLEAR TRANSPORT/COMPLEX, gtp-binding nuclear protein                   |
| 1qbk-B         | 12.8                                   | NUCLEAR TRANSPORT PROTEIN COMPLEX, karyopherin (importin) beta2 fragment |
| 1qgr-A         | 12.7                                   | TRANSPORT RECEPTOR, karyopherin (importin) beta subunit                  |
| 1u6g-C         | 12.6                                   | LIGASE, cullin homolog 1 (cul-1) ring-box protein 1                      |
| 1upk-A         | 11.1                                   | TRANSFERASE, mo25 protein (mo25 alpha, cgi 66)                           |
| 1oyz-A         | 10.8                                   | STRUCTURAL GENOMICS, UNKNOWN FUNCTION, hypothetical protein              |
| 1gw5-A         | 10.8                                   | ENDOCYTOSIS, adaptor-related protein complex 2 alpha 2                   |
| 1b3u-A         | 10.6                                   | SCAFFOLD PROTEIN, protein phosphatase pp2a fragment                      |
