# Supplementary material
Source: PubMed Central journal article supplement (PMC2754402)
Supplement: NIHMS115014-supplement-02.pdf [file NIHMS115014-supplement-02.pdf]

## Supplementary Table 2. Tether repeat (TR) motif family

### Consensus:

|  |                  | $\alpha 1$                                |  | $\alpha 2$                                       |  | $\alpha 3$               |
|--|------------------|-------------------------------------------|--|--------------------------------------------------|--|--------------------------|
|  | TR <sup>1</sup>  | xxxx <b>LL</b> xx <b>LL</b> x <b>LL</b> x |  | xxxxxxxxxxx <b>LL</b> x <b>LL</b> xx <b>LL</b> x |  | xxxxxxxxxxxx <b>LL</b> x |
|  | ARM <sup>2</sup> | <b>GGLPALV</b> x <b>LL</b>                |  | ExxLxx <b>AA</b> x <b>AL</b> xNLS                |  | xxxNxx <b>ALL</b>        |

<sup>1</sup>TR, tether repeat

<sup>2</sup>ARM, armadillo repeat

### p115 (Rab1)

|      |                   | $\alpha 1$                          |      | $\alpha 2$                             |      | $\alpha 3$               |
|------|-------------------|-------------------------------------|------|----------------------------------------|------|--------------------------|
| TR1  | N-20 <sup>1</sup> | .. <b>AETIQKLCDRVA</b> <sup>2</sup> | (3)  | ... <b>LLDDRRNAVRALKSLS</b>            | (3)  | ..... <b>RLEVGIQ</b>     |
| TR2  | (0) <sup>3</sup>  | ... <b>AMEHLHVLQ</b> T              | (3)  | ...DSEIIGY <b>ALD</b> TLYN <b>II</b>   | (18) | ...LGSQFTEI <b>FTKQQ</b> |
| TR3  | (1)               | ... <b>NVTLLSLL</b>                 | (3)  | ...DFHVRWP <b>GVKLLTSLKQ</b>           | (0)  | ...LGPQVQ <b>QIILV</b>   |
| TR4  | (2)               | ... <b>MGVSRLLDLLAD</b>             | (1)  | ...REVIRND <b>GVLLQALT</b>             | (2)  | ...NGAIQ <b>KIVAFE</b>   |
| TR5  | (0)               | ... <b>NAFERLLDIITEEG</b>           | (5)  | .....IVVED <b>CLILLQ</b> NLL           | (2)  | .....NNSNQ <b>FFKEG</b>  |
| TR6  | (1)               | ... <b>YIQRMKPVFE</b>               | (8)  | SAQKVTLNLHL <b>MLQLV</b> RVLV          | (4)  | PPGATSS <b>QKAMFQC</b>   |
| TR7  | (0)               | ... <b>GLLQQLCTILM</b>              | (4)  | ...PADILTE <b>TINTVSEVI</b>            | (2)  | ...CQVNQ <b>DFASV</b>    |
| TR8  | (8)               | ... <b>PAIVVLLMSMVN</b>             | (3)  | ...PFVLRCA <b>VLYCFQCF</b> L           | (2)  | NQKGQGEI <b>VSTLL</b>    |
| TR9  | (11)              | ... <b>SAGQLLCGG</b>                | (6)  | .....LSNWC <b>AAVALAHAL</b>            | (2)  | ...NATQ <b>KEQLL</b>     |
| TR10 | (13)              | ... <b>SLLQQCTNI</b>                | (5)  | ...KIQTRV <b>GLMLLCTWL</b>             | (2)  | ...CPIAV <b>THFL</b>     |
| TR11 | (4)               | ... <b>NVPFLTGQIA</b>               | (3)  | GEEEQLV <b>QGLCALLL</b> GIS <b>IYF</b> | (8)  | ...MKEK <b>LKQLIEKR</b>  |
| TR12 | (1)               | GKEN <b>FTIEKLG</b> ISKH            | (23) | .HEFTKL <b>VKELEGVITKATYK</b>          |      |                          |

<sup>1</sup>N-terminal residue number of tether repeat

<sup>2</sup>Known GTPase binding regions are highlighted in yellow

<sup>3</sup>Values in parentheses are number of insertion residues between adjacent helices

### Gm130 (Rab1)

|                    |       | $\alpha 1$                             |      | $\alpha 2$                                    |      | $\alpha 3$                       |
|--------------------|-------|----------------------------------------|------|-----------------------------------------------|------|----------------------------------|
| TR1                | N-77  | GVPSPGAS <b>LT</b> SMA                 | (2)  | .....QNHD <b>ADNVP</b> NLM                    | (14) | ...LSQQ <b>LNG</b> LV <b>CES</b> |
| TR2                | (4)   | NGEG <b>PASSANL</b>                    | (19) | .....TNQ <b>LNI</b> TIEKL                     | (16) | ...ECHQ <b>KGAL</b> REQ          |
| TR3                | (0)   | LQVHIQ <b>TIG</b> LV                   | (0)  | .....SEK <b>AE</b> LQ <b>TAL</b>              | (0)  | .....AHTQ <b>HAARQK</b>          |
| TR4                | (16)  | RVGELER <b>ALS</b> AV                  | (15) | .....KERD <b>ALR</b> LELY                     | (14) | ...ELEE <b>KLRV</b> L            |
| TR5                | (0)   | VTEK <b>AGM</b> Q <b>LNL</b>           | (4)  | .....KKLE <b>MT</b> ELL <b>LLQ</b> Q <b>F</b> | (8)  | ...ANQQ <b>LQQA</b> MEER         |
| TR6                | (2)   | LEAH <b>LGQ</b> V <b>MESV</b>          | (9)  | .....YAEN <b>LK</b> GESAM                     |      |                                  |
| (Gap) <sup>1</sup> |       |                                        |      |                                               |      |                                  |
| TR1                | N-460 | <b>LRKELEGLAGQL</b>                    | (16) | .....QEER <b>LLE</b> LERAA                    | (5)  | ...QAEAR <b>RQIL</b> ETM         |
| TR2                | (16)  | <b>LKEQLAELQSGF</b>                    | (3)  | .....TNEN <b>ME</b> ITSAL                     | (2)  | ...EQHV <b>KREL</b> GK <b>KL</b> |
| TR3                | (2)   | <b>LQEKLSLKE</b> TV                    | (14) | .....RDQ <b>YLGH</b> LQ <b>QYV</b>            | (9)  | ...KEVL <b>HNQL</b> LLQ <b>T</b> |
| TR4                | (8)   | <b>QEAQGKVAEMA</b>                     | (20) | .....LRA <b>QLSL</b> MA <b>HPG</b>            | (13) | ...EEEE <b>EA</b> VAV <b>PQ</b>  |
| TR5                | (9)   | <b>ESREAMVAFNSAV</b>                   | (19) | .....RCR <b>RLA</b> HL <b>LLASA</b>           | (0)  | ...QKE <b>PEAAA</b> P            |
| TR6                | (0)   | ... <b>APGTGGDSVC</b>                  | (1)  | .....E <b>THR</b> AL <b>QQA</b> ME <b>KL</b>  | (17) | ...VEE <b>LEHR</b> CT <b>QLS</b> |
| TR7                | (0)   | GETD <b>TIGEY</b> ITALY                |      |                                               |      |                                  |
| (Gap)              |       |                                        |      |                                               |      |                                  |
| TR1                | N-869 | <b>KLLELQELVLR</b> LV                  | (5)  | .....WHGR <b>FLAAAQ</b> N <b>PA</b>           | (14) | ...AAN <b>QQGD</b> LC            |
| TR2                | (0)   | .EV <b>S</b> LAG <b>S</b> VE <b>PA</b> | (13) | .....TAQ <b>QIM</b> QL <b>REM</b>             | (23) | ...NDE <b>VKIT</b> VI            |

<sup>1</sup>(Gap), a region > 23 amino acids separating the previous TR domain from the subsequent TR domain

### Gmap-210 (ARF1), (Gmap-210 grab domain: 1774-1823)

|       |       | $\alpha 1$                             |      | $\alpha 2$                                  |      | $\alpha 3$                       |
|-------|-------|----------------------------------------|------|---------------------------------------------|------|----------------------------------|
| TR1   | N-8   | LGSG <b>LGQS</b> LG <b>QVG</b>         | (5)  | .....LTG <b>QISN</b> FT <b>KDML</b>         | (13) | ...SRTKEI <b>EATHAI</b>          |
| (Gap) |       |                                        |      |                                             |      |                                  |
| TR1   | N-267 | ELEN <b>LLQQG</b> SG <b>GV</b>         | (12) | .....KTI <b>QVL</b> Q <b>IEKV</b>           | (21) | ...SAENDR <b>DLRRE</b>           |
| TR2   | (6)   | EKRQ <b>IMEECENL</b>                   | (20) | .....KERI <b>LAQ</b> SAS <b>V</b>           | (1)  | ...EVFRL <b>QQA</b> LS <b>DA</b> |
| (Gap) |       |                                        |      |                                             |      |                                  |
| TR1   | N-489 | EKET <b>LIAE</b> TEEL                  | (2)  | .....QNQ <b>EAT</b> KH <b>MLI</b>           | (6)  | ...QQNE <b>GDS</b> IT <b>SKL</b> |
| TR2   | (14)  | .EDDK <b>M</b> DI <b>T</b> KE <b>L</b> | (8)  | .....QSE <b>V</b> AL <b>NDL</b> HL <b>T</b> | (3)  | ...LEDK <b>VEN</b> LV <b>DQL</b> |

|       |        |               |      |                     |      |                  |
|-------|--------|---------------|------|---------------------|------|------------------|
| (Gap) |        |               |      |                     |      |                  |
| TR1   | N-664  | .LNENLKKVAFDV | (2)  | .....ENEKLVLACEDV   | (0)  | ....RHQLEBCLAGNN |
| TR2   | (4)    | EKNTIVETLKM   | (21) | .....KYEKTTEEELSNA  | (7)  | ....LQLEHEHLTKLN |
| (Gap) |        |               |      |                     |      |                  |
| TR1   | N-1038 | .KNISLTKQIDQL | 0    | .....SKDEVGKLTQII   | 1    | ....QKDLEIQALHAR |
| (Gap) |        |               |      |                     |      |                  |
| TR1   | N-1123 | MDIVAAKEAALI  | (19) | .....MFRETIQNLSRII  | (1)  | ....EKDIEIDAL    |
| TR2   | (0)    | ..SQKQTLAVL   | (0)  | .....QTSSTGNEAGGV   | (0)  | ....NSHQFEEQLQER |
| TR3   | (12)   | WKQQVMTVQNM   | (9)  | .....ELHQQAQVLV     | (7)  | ....LQVDYTGTLQSY |
| TR4   | (2)    | NETKLKNFGQELA | (11) | .....TKDLLLGKLDII   | (17) | ....LRASKSEVLSES |
| (Gap) |        |               |      |                     |      |                  |
| TR1   | N-1435 | NENELLRQAVINL | (0)  | .....KERILILEMDIG   | (14) | ....GKETEYQALQET |
| TR2   | (17)   | MKEKALAFEQLL  | (9)  | .....ELNQLLNAVKSM   | (7)  | ....QQERDQVMLALK |
| (Gap) |        |               |      |                     |      |                  |
| TR1   | N-1651 | QRDETALQLSV   | (7)  | .....YALS LANLQOMVL | (13) | ....ELEKQKQLTAEW |
| TR2   | (6)    | LEGKVISLQECL  | (1)  | .....EANAALDSASRLT  | (15) | ....QNELRQEMLDDV |
| TR3   | (14)   | VDKVLMRNLFIG  | (7)  | .....QRHEVLRLMGSLI  | (2)  | ....RREEMQLFHDD  |
| TR4   | (3)    | VTRWMTGWLGGG  | (16) | .....VNSSFSELFVKFL  | (12) | ....LSVHDMKPLDSP |
| TR5   | (4)    | RDTNAPESFKDTA |      |                     |      |                  |

**Golgin-245 (ARL1), (Golgin-245 grip domain: 2168-2215) (PDB-1R4A)<sup>1</sup>**

|       |        | $\alpha 1$      |      | $\alpha 2$         |      | $\alpha 3$          |
|-------|--------|-----------------|------|--------------------|------|---------------------|
| TR1   | N-57   | DTQSFAQKLQL     | (0)  | .....RVPSVESLFRSPI | (5)  | ....RSSSKESLVRTS    |
| (Gap) |        |                 |      |                    |      |                     |
| TR1   | N-135  | NKEQLIQRLRRME   | (9)  | .....YSELVTAYQML   | (2)  | ....EKKKLQGILSQS    |
| (Gap) |        |                 |      |                    |      |                     |
| TR1   | N-267  | DGEPVVEDGTSVK   | (11) | .....QENLLKRCKETI  | (2)  | ....HKEQCTLLTSE     |
| TR2   | (12)   | QELEKIKDLHMA    | (5)  | .....ITQLRDAKNI    | (22) | ....EMKEEIAQLR      |
| TR3   | (20)   | SERAAFEELKAL    |      |                    |      |                     |
| (Gap) |        |                 |      |                    |      |                     |
| TR1   | N-658  | KDKEIIFQAHIE    | (2)  | .....NEKTLEKLDVK   | (7)  | ....SSELSEVLKAR     |
| (Gap) |        |                 |      |                    |      |                     |
| TR1   | N-834  | ERILLTKQVAEVE   | (2)  | .....KKDVCTELDAH   | (0)  | ....KIQVQDLMQQL     |
| (Gap) |        |                 |      |                    |      |                     |
| TR1   | N-909  | KENMILQMQREGQ   | (0)  | .....KKEIEILTQKLS  |      |                     |
| (Gap) |        |                 |      |                    |      |                     |
| TR1   | N-981  | LKKELENTALELS   | (4)  | .....QFNAKMLEMA    | (30) | ....SAGISDAVSRL     |
| TR2   | (3)    | QKEQIESLTVH     | (0)  | .....RRELNDVISIW   | (19) | ....QEKEQEVaelk     |
| (Gap) |        |                 |      |                    |      |                     |
| TR1   | N-1209 | LSEELAIQLDICC   | (20) | .....KTNAILSRISHCQ | (3)  | ....TKVKEALLIKT     |
| (Gap) |        |                 |      |                    |      |                     |
| TR1   | N-1536 | QKTIEIESLNEVL   | (10) | .....HKELVQKLQHFQ  | (10) | ....KEAEKILITLE     |
| (Gap) |        |                 |      |                    |      |                     |
| TR1   | N-1773 |                 |      | .....YQERLIKLEHAE  | (2)  | ....QHEDQSMIGHL     |
| TR2   | (7)    | NKKYSLIVAQHVE   | (10) | .....KQNLLENVFDDVQ | (17) | ....KELDSCLVRQK     |
| TR3   | (0)    | .EVHRVEMEELT    | (1)  | .....KYEKLQALQQMD  | (1)  | ....RNKPTELLEEN     |
| TR4   | (9)    | VQPKLLSNMEAQ    | (14) | .....KQKLGKEIVRLQ  | (9)  | ....HQQELEILKKE     |
| TR5   | (18)   | KHNSTLKQLMREFN  | (6)  | .....EQLEMTIKEI    | (3)  | ....QEVEAEELLES     |
| TR6   | (0)    | ..QEE TNQLLKKIA | (20) | .....EEEMTAKVRDLQ  | (13) | ....LEQEENPGNDN     |
| TR7   | (5)    | LQTQLAQKTTLS    | (22) | .....YEKNVYATTVGT  | (7)  | ....YHTDVS LFGEP    |
| TR8   | (0)    | TEFEYLRKVLFEYM  | (4)  | .....TKTMAKVITTVL  | (3)  | ....DDQTQKILEREDARI |

Table 3 (to be continued)

<sup>1</sup>See Fig.8A

**Giantin (Rab1)**

|       |       | $\alpha 1$   |      | $\alpha 2$         |      | $\alpha 3$       |
|-------|-------|--------------|------|--------------------|------|------------------|
| TR1   | N-155 | EKEELISTLQA  | (12) | .....SSTEMEEFVMM   | (10) | ....QLQEKEEFISTL |
| TR2   | (4)   | SQTQAEQAAQVV | (13) | .....HEDELLQLVTQA  | (4)  | ....EMQQKLRVLQRK |
| TR3   | (3)   | HEESLVGRAQVV |      |                    |      |                  |
| (Gap) |       |              |      |                    |      |                  |
| TR1   | N-316 | ESKILLEKMEEL | (11) | .....LQEEEMHLLLEQF | (8)  | ....ELESRYSALEQK |

|       |        |                              |      |                             |      |                            |
|-------|--------|------------------------------|------|-----------------------------|------|----------------------------|
| TR2   | (7)    | KTSH <b>ILSLQK</b> <b>TG</b> | (0)  | .....QE <b>LQSACDAL</b>     | (0)  | ....KDQNSK <b>LLQD</b>     |
| TR3   | (0)    | KNEQ <b>AVQSAQTI</b>         | (9)  | .....KSKE <b>ISQFLNRL</b>   | (5)  | ....ETASQ <b>TSFP</b>      |
| TR4   | (0)    | ..D <b>VYNEGTQAV</b>         | (15) | .....ENEK <b>GALLSSI</b>    | (10) | ....KLSSQ <b>ITLLEAQ</b>   |
| TR5   | (5)    | ADRE <b>VSEISIV</b>          | (20) | .....KHKE <b>LSVLLLEM</b>   | (1)  | ....EAQEE <b>IAFLKLQ</b>   |
| TR6   | (19)   | KQME <b>GEGIAP I</b>         | (0)  | .....KMKV <b>FLEDTGQDFP</b> | (3)  | ....NEESS <b>LP AVEKE</b>  |
| TR7   | (12)   | EEIS <b>LNDAGVEL</b>         | (6)  | .....GDKS <b>LSAVPDIG</b>   | (6)  | ....LERLK <b>SQILE</b>     |
| TR8   | (0)    | LELN <b>FHKAQE IY</b>        | (9)  | .....EISN <b>LNQLIEEF</b>   | (5)  | ....NNSSA <b>FTALSE</b>    |
| TR9   | (0)    | ERDQ <b>LLSQVKEL</b>         |      |                             |      |                            |
| (Gap) |        |                              |      |                             |      |                            |
| TR1   | N-843  | KESE <b>VLEGAERV</b>         | (2)  | .....ISSK <b>VEELSQAL</b>   | (5)  | ....EITKM <b>DQLLE</b>     |
| TR2   | (0)    | KKRD <b>VE TLQQTI</b>        | (9)  | .....ISFS <b>MTEK MVQL</b>  | (0)  | ....NEEK <b>FSLGVEI</b>    |
| TR3   | (4)    | EQLN <b>LLSRAEEA</b>         | (17) | .....NYDE <b>MSPAGQ I</b>   | (3)  | ....ELQH <b>EFDLLKKE</b>   |
| TR4   | (13)   | NRKE <b>LLQRVSRL</b>         |      |                             |      |                            |
| (Gap) |        |                              |      |                             |      |                            |
| TR1   | N-1054 | KCQE <b>IEIY LKQTI</b>       | (19) | .....AEEQ <b>FQALVKQM</b>   | (5)  | ....DKT <b>NQIDLLQAE</b>   |
| TR2   | (1)    | .SEN <b>QAI IQKLI</b>        | (9)  | .....DSVA <b>LVKETVVI</b>   | (11) | ....KPE <b>LEBKILALE</b>   |
| (Gap) |        |                              |      |                             |      |                            |
| TR1   | N-1378 | LQIA <b>GLEHLREL</b>         | (0)  | .....QPK <b>LDELQKLI</b>    | (12) | ....QLS <b>EKEAALTKI</b>   |
| (Gap) |        |                              |      |                             |      |                            |
| TR1   | N-1502 | LQEE <b>LSLARGTI</b>         | (19) | .....EKDT <b>VLGRLLALL</b>  | (7)  | ....IT <b>EMDRS LLENQ</b>  |
| TR2   | (4)    | SCES <b>LKLAL EGLT</b>       | (1)  | .....DKEK <b>LVKEIESL</b>   | (17) | ....LQK <b>EYBIL LQSY</b>  |
| TR3   | (5)    | EAER <b>IQHVVEAV</b>         |      |                             |      |                            |
| (Gap) |        |                              |      |                             |      |                            |
| TR1   | N-1814 | SVPS <b>AKSANPAV</b>         | (8)  | .....EINN <b>YLQO IDQL</b>  | (20) | ....LENE <b>KNTLLSQI</b>   |
| TR2   | (9)    | LQEE <b>VTKMNL L</b>         | (6)  | .....ELSR <b>VTKLKE TA</b>  | (3)  | ....KDD <b>LEERLMNQL</b>   |
| TR3   | (2)    | LNGS <b>IGNYCQDVT</b>        | (11) | .....EMKN <b>LKCVSEL</b>    | (0)  | ....EE <b>EKQQLVKEK</b>    |
| TR4   | (6)    | IRKE <b>YLEKIQGA</b>         | (5)  | .....NKSH <b>AKELQELL</b>   | (6)  | ....VK <b>QLQKDC TRYQ</b>  |
| TR5   | (0)    | EKIS <b>ALERTVKAL</b>        |      |                             |      |                            |
| (Gap) |        |                              |      |                             |      |                            |
| TR1   | N-2155 | LEET <b>IGEIQVTL</b>         | (16) | .....TVT <b>QLAAFTKSM</b>   | (2)  | ....LQD <b>DRDRVIDEA</b>   |
| (Gap) |        |                              |      |                             |      |                            |
| TR1   | N-2390 | GKEE <b>AIQVAIAEL</b>        | (3)  | .....HDKE <b>TKELENLL</b>   | (1)  | ....QEE <b>EENI VLEEE</b>  |
| TR2   | (6)    | KTNQ <b>LMETL KTI</b>        | (9)  | .....QLDS <b>FVKSMSSL</b>   | (14) | ....EER <b>HL SILEKD</b>   |
| (Gap) |        |                              |      |                             |      |                            |
| TR1   | N-2621 | LQEE <b>GTLGLYHA</b>         | (4)  | .....KEEE <b>VHRLSALF</b>   | (6)  | ....IAE <b>LEEE LV CVQ</b> |
| (Gap) |        |                              |      |                             |      |                            |
| TR1   | N-2731 | QIQS <b>FGRSMSSL</b>         | (17) | .....YDAS <b>LKELAQ L</b>   | (5)  | ....LNR <b>ERDALLSET</b>   |
| (Gap) |        |                              |      |                             |      |                            |
| TR1   | N-2830 | QVQS <b>FSKAMASL</b>         | (2)  | .....ERDH <b>LWNELEKF</b>   | (3)  | ....EEG <b>KQRSAAQPS</b>   |
| TR2   | (4)    | EVQS <b>LKKAMSSL</b>         | (2)  | .....DRDR <b>LLKE LKNL</b>  | (22) | ....EYQ <b>DKTKAFQIM</b>   |
| (Gap) |        |                              |      |                             |      |                            |
| TR1   | N-3146 | TRQE <b>VNELRKLL</b>         | (4)  | .....DQR <b>VAAENALSVA</b>  | (22) | ....CGT <b>QEQALLIDL</b>   |

**Golgin-84 (Rab1)**

|       |       | $\alpha 1$            |      | $\alpha 2$                 |      | $\alpha 3$                |
|-------|-------|-----------------------|------|----------------------------|------|---------------------------|
| TR1   | N-3   | WFVD <b>LAGKAEDLL</b> | (0)  | .....NRVD <b>QGAATAL</b>   | (18) | ....LHQ <b>QNTDLIYQT</b>  |
| TR2   | (1)   | PKST <b>YISSAADNI</b> | (1)  | .....NQKA <b>TILAGTANV</b> | (18) | ....VPR <b>PSSH FVRRK</b> |
| TR3   | (15)  | SQKE <b>PTGRVEI</b>   | (20) | .....VNPS <b>VTTIKTI</b>   | (4)  | ....FGS <b>QTHEAASNS</b>  |
| (Gap) |       |                       |      |                            |      |                           |
| TR1   | N-275 | KSDR <b>MTRGLRA</b>   | (0)  | .....QVDD <b>LTEAVAA</b>   | (10) | ....RLQ <b>EADQLLSTR</b>  |
| (Gap) |       |                       |      |                            |      |                           |
| TR1   | N-350 | LQER <b>LHEADATL</b>  | (9)  | .....MQSE <b>FAARLNKV</b>  | (5)  | ....NLAE <b>AITLAERK</b>  |
| (Gap) |       |                       |      |                            |      |                           |
| TR1   | N-611 | EKNS <b>LVFQLERL</b>  | (16) | .....INMS <b>GIDN GEGT</b> | (0)  | ....RLR <b>NVPLFNDT</b>   |
| TR2   | (2)   | NLAG <b>MYGKVRKAA</b> | (1)  | .....SIDQ <b>FSIRLGI</b>   | (0)  | ....FLR <b>RYPIAR</b>     |

**Bicaudal D1 (Rab6), Bicaudal D1 rab6a binding domain: 663-803)**

|     |      | $\alpha 1$            |      | $\alpha 2$                |      | $\alpha 3$               |
|-----|------|-----------------------|------|---------------------------|------|--------------------------|
| TR1 | N-30 | EKI <b>QAAEYGLVVL</b> | (19) | .....LKQE <b>LEQLKEAF</b> | (10) | ....GET <b>REETLLQES</b> |
| TR2 | (2)  | KEAY <b>YLKILLEM</b>  | (16) | .....ENER <b>LTAVVQDL</b> | (20) | ....YKF <b>REARLLQDY</b> |

|       |       |                             |      |                                   |      |                                |
|-------|-------|-----------------------------|------|-----------------------------------|------|--------------------------------|
| TR3   | (4)   | EENI <b>TLQKLVSTL</b>       | (23) | ..... <b>LNSQLED<b>AIRL</b></b>   | (3)  | ... <b>AEHQLE<b>EAL</b>ETL</b> |
| TR4   | (9)   | LRKE <b>LSQYISL</b>         | (6)  | ..... <b>ISVD<b>GLKFAEDG</b></b>  | (9)  | ... <b>NGHIHG<b>P</b>LVKLN</b> |
| TR5   | (9)   | KGES <b>LNPVSDLF</b>        | (16) | ..... <b>EREK<b>AILLANL</b></b>   | (5)  | ... <b>QLEHTK<b>GALTEQ</b></b> |
| (Gap) |       |                             |      |                                   |      |                                |
| TR1   | N-483 | MEKE <b>LQKMTSIA</b>        | (16) | ..... <b>FSE<b>ELAQLYHHVC</b></b> | (3)  | ... <b>NETPNR<b>VMLDYY</b></b> |
| (Gap) |       |                             |      |                                   |      |                                |
| TR1   | N-621 | EPMN <b>IYNLNAII</b>        | (0)  | ..... <b>RDQIKH<b>LQKAV</b></b>   | (8)  | ... <b>QRAA<b>ARELAPMI</b></b> |
| TR2   | (2)   | <b>DKEAL<b>MEEILKL</b></b>  | (8)  | ..... <b>EQIAT<b>LR</b>AVLKA</b>  | (1)  | ... <b>KQTAE<b>VALANLK</b></b> |
| TR3   | (4)   | <b>NEKAM<b>VTE</b>TMTKL</b> | (8)  | ..... <b>EDAA<b>TFSS</b>LRTMF</b> | (10) | ... <b>LDEM<b>QRQLAAAE</b></b> |
| TR4   | (0)   | <b>DEKK<b>TLNT</b>LLRMA</b> | (2)  | ..... <b>QKLAL<b>TQRLEDL</b></b>  | (6)  | ... <b>SRRSK<b>GKLGKSK</b></b> |

**Iporin(Rab1), (Iporin run domain: 1031-1175)**

|     |        | $\alpha 1$                  |     | $\alpha 2$                        |      | $\alpha 3$                     |
|-----|--------|-----------------------------|-----|-----------------------------------|------|--------------------------------|
| TR1 | N-1032 | <b>VGHL<b>VLKY</b>LCPAV</b> | (3) | ..... <b>LEDGL<b>KAFVLDVI</b></b> | (3)  | ... <b>RKNMP<b>WSVVEAS</b></b> |
| TR2 | (4)    | <b>PSTK<b>VLHG</b>LYNKV</b> | (8) | ..... <b>HTMR<b>FNAFIL</b>GLL</b> | (10) | ... <b>HLNHED<b>IIQTH</b></b>  |
| TR3 | (0)    | <b>YQPW<b>GFLS</b>AAHTV</b> | (3) | ..... <b>LFEE<b>LLLLLQPLA</b></b> | (0)  | ... <b>LLPFS<b>LDLLFQ</b></b>  |

**MICAL-1(Rab1), (MICAL-1 rab1 binding domain: 1029-1067)**

|     |        | $\alpha 1$                  |      | $\alpha 2$                               |  | $\alpha 3$ |
|-----|--------|-----------------------------|------|------------------------------------------|--|------------|
| TR1 | N-1029 | <b>AEDQ<b>VLRK</b>LVDLV</b> | (10) | ..... <b>EE<b>RR</b>LSE<b>LALGTG</b></b> |  |            |

**Rabenosyn-5(Rab4, 5 & 22), (Rabenosyn-5 rab4 binding domain: 440-503) (PDB-1ZOK)<sup>1</sup>**

|     |       | $\alpha 1$                                    |     | $\alpha 2$                                   |  | $\alpha 3$ |
|-----|-------|-----------------------------------------------|-----|----------------------------------------------|--|------------|
| TR1 | N-456 | <b>SDP<b>LLQQI</b>HNITS<b>FIRQA</b></b><br>KA | (3) | <b>MDE<b>VRTLQ</b>ENLRQLQDEYDQQQT</b><br>EKA |  |            |

<sup>1</sup>See Fig.7B

**Rabenosyn-5(Rab4, 5 & 22), (Rabenosyn-5 rab5 & rab22 binding domain: 728-784) (PDB-1ZOJ)<sup>1</sup>**

|     |       | $\alpha 1$                                    |     | $\alpha 2$                                   |  | $\alpha 3$ |
|-----|-------|-----------------------------------------------|-----|----------------------------------------------|--|------------|
| TR1 | N-736 | <b>EEL<b>LLQQI</b>DN<b>IKAYIFDA</b></b><br>KQ | (3) | <b>LDE<b>VEVLT</b>ENLRELKHTLAKQKG</b><br>GTD |  |            |

<sup>1</sup>See Fig.7B

**Rabaptin5(Rab5), (Rabaptin5 rab5 binding domain: 789-862) (PDB-1TU3)<sup>1</sup>**

|     |       | $\alpha 1$ |  | $\alpha 2$                                                                   |     | $\alpha 3$                   |
|-----|-------|------------|--|------------------------------------------------------------------------------|-----|------------------------------|
| TR1 | N-803 |            |  | <b>KNKAQRLQ<b>TEL</b>DVSEQVQ<b>RD</b>FVK</b><br><b>LSQ<b>TLQVQ</b>LERIRQ</b> | (3) | ... <b>LERI<b>RAILND</b></b> |

<sup>1</sup>See Fig.7B

**EEA1(rab5), (EEA1 rab5 binding domain: 38-63)**

|     |      | $\alpha 1$                   |     | $\alpha 2$                       |  | $\alpha 3$ |
|-----|------|------------------------------|-----|----------------------------------|--|------------|
| TR1 | N-38 | <b>SEGF<b>ICPQ</b>CMKSLG</b> | (0) | ..... <b>SADE<b>LFKH</b>YEAV</b> |  |            |

**Rim3(Rab3A)**

|     |       | $\alpha 1$                  |      | $\alpha 2$                        |     | $\alpha 3$                     |
|-----|-------|-----------------------------|------|-----------------------------------|-----|--------------------------------|
| TR1 | N-217 | TCDP <b>LYQQAL<b>LF</b></b> | (20) | ..... <b>DHKC<b>FMGMAQIML</b></b> | (0) | ... <b>DEL<b>DLSAAV</b>TGW</b> |

**Noc2(Rab3A)**

|     |       | $\alpha 1$            |      | $\alpha 2$                         |     | $\alpha 3$                     |
|-----|-------|-----------------------|------|------------------------------------|-----|--------------------------------|
| TR1 | N-169 | LFHE <b>VVQAFRAAV</b> | (17) | ..... <b>TDSA<b>AFNALVTF</b>CI</b> | (2) | ... <b>LIGCL<b>QKLL</b>FGK</b> |

**Rabphilin-3A rab3A binding domain: (40-170)**

|     |      | $\alpha 1$ |  | $\alpha 2$                                                                                |      | $\alpha 3$               |
|-----|------|------------|--|-------------------------------------------------------------------------------------------|------|--------------------------|
| TR1 | N-50 |            |  | <b>EKE<b>IINR</b>VIAR<b>AEKMET</b>MEQ<b>ER</b>I</b><br><b>GR<b>LVDR</b>LET<b>MRKN</b></b> | (64) | ... <b>SGAW<b>FF</b></b> |
